# Supplementary material
Source: Springer Nature journal article supplement (https://www.springermedizin.de/resource/supplementary/12885_2012_3581_MOESM1_ESM.pdf/9463242)

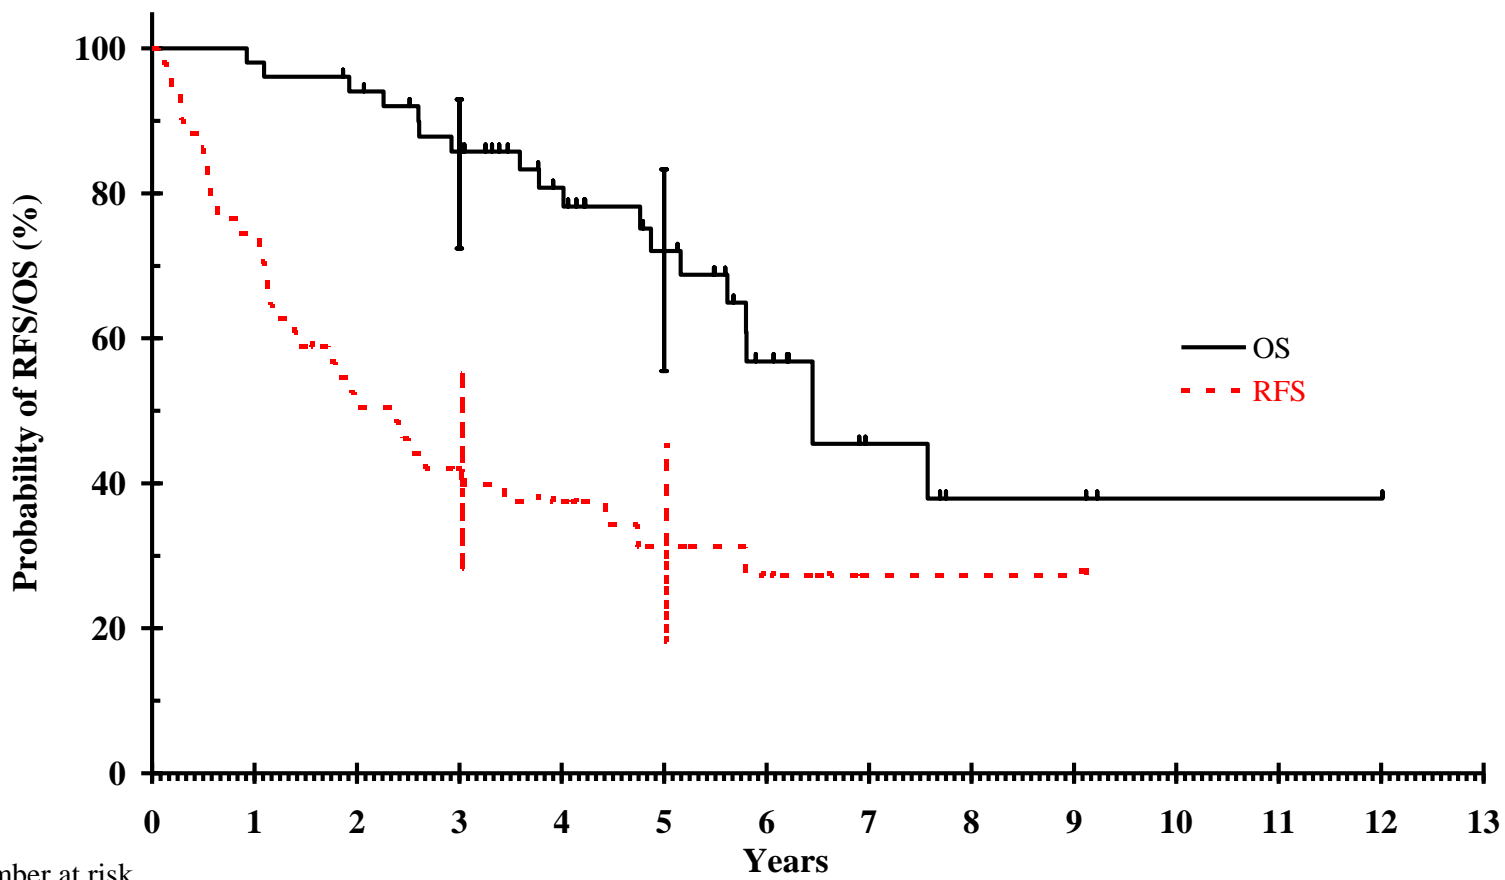

Number at risk

|     |    |    |    |    |    |    |    |   |   |   |   |   |   |
|-----|----|----|----|----|----|----|----|---|---|---|---|---|---|
| OS  | 51 | 50 | 47 | 41 | 31 | 23 | 13 | 6 | 3 | 3 | 1 | 1 | 1 |
| RFS | 51 | 38 | 24 | 19 | 14 | 9  | 6  | 2 | 2 | 2 |   |   |   |

Supplement: MOESM1 [file 9463242]
